# Supplementary material for: Versatile fluorinated Pd@Au nanoplates doped with yttrium for tumor theranostics
Source: Royal Society of Chemistry journal article supplement (doi:10.1039/d1bm00173f), 2021-01-01
Supplement: d1bm00173f1.pdf [file d1bm00173f1.pdf]

## Supporting Information

### **A versatile fluorinated Pd@Au nanoplates doped with yttrium for tumor theranostics**

Hailong Jiang<sup>1, a</sup>, Jingchao Li<sup>1, a</sup>, Changrong Shi<sup>a</sup>, Jiang Ming<sup>b</sup>, Deliang Zhang<sup>a</sup>, Rongqiang Zhuang<sup>a</sup>, Zhide Guo<sup>\*, a</sup>, Xianzhong Zhang<sup>\*, a</sup>

a State Key Laboratory of Molecular Vaccinology and Molecular Diagnostics, Center for Molecular Imaging and Translational Medicine, School of Public Health, Xiamen University, Xiamen 361102, China

b State Key Laboratory for Physical Chemistry of Solid Surfaces, Collaborative Innovation Center of Chemistry for Energy Materials and Engineering, Research Center for Nano-Preparation Technology of Fujian Province, College of Chemistry and Chemical Engineering, Xiamen University, Xiamen 361005, China

## Contents

### Supporting Figures

**Figure S1.** DLS size distributions of FY-NCs and FY-Pd@Au NCS.

**Figure S2.** The distribution of height for FY-Pd@Au NCs in AFM.

**Figure S3.** FT-IR spectra of FY-NCs and FY-Pd@Au NCs.

**Figure S4.** The DCFH-DA fluorescence for H<sub>2</sub>O, Pd@Au, FY-NCs and FY-Pd@Au NCs with 808 nm laser irradiation.

**Figure S5.** The mean DFCH-DA fluorescence for saline, Pd@Au, FY-NCs and FY-Pd@Au NCs with 808 nm laser irradiation.

**Figure S6.** MTT of 4T1 cells treated with Pd@Au, FY-NCs and FY-Pd@Au NCs.

**Figure S7.** UV-vis absorption spectra of FY-Pd@Au NCs before and after 3 days treated.

**Figure S8.** H&E-stained tumor slices after treatments.

**Table 1.** The <sup>19</sup>F Relaxation Times of FY-Pd@Au NCs.

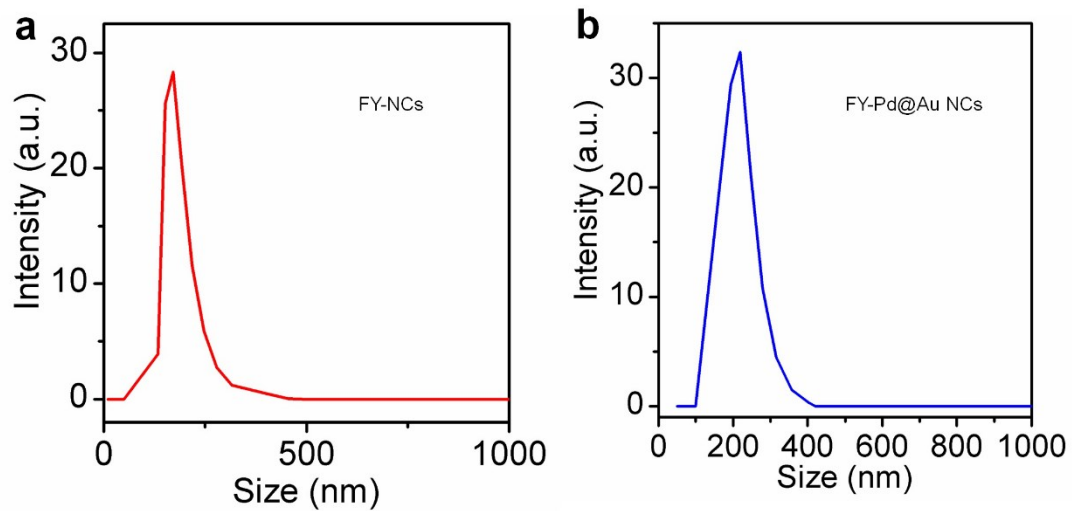

**Figure S1.** DLS size distributions of FY-NCs and FY-Pd@Au NCS.

s2\_0004ZSensorRetraceMod0  
Xa 264.11 nm  
Ya 498.03 nm  
Za -34.59 nm  
Xb 287.34 nm  
Yb 299.95 nm  
Zb 211.49 nm  
dx 23.22 nm  
dy -198.08 nm  
dz 246.09 nm  
dxy 199.43 nm  
Surface 362.16 nm  
SurfaceSlope 1.23 m/m  
SurfaceAngle 51°

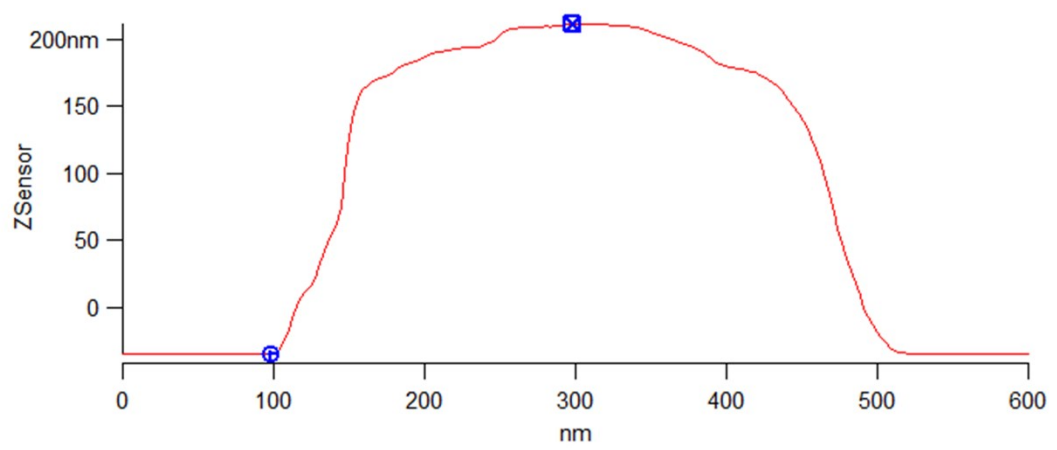

**Figure S2.** The distribution of height for FY-Pd@Au NCs in AFM.

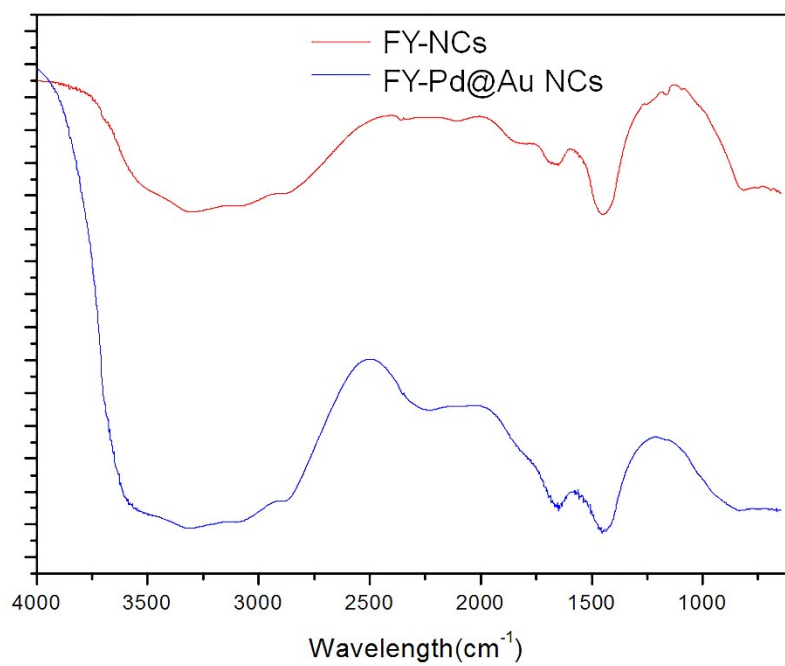

**Figure S3.** FT-IR spectra of FY-NCs and FY-Pd@Au NCs.

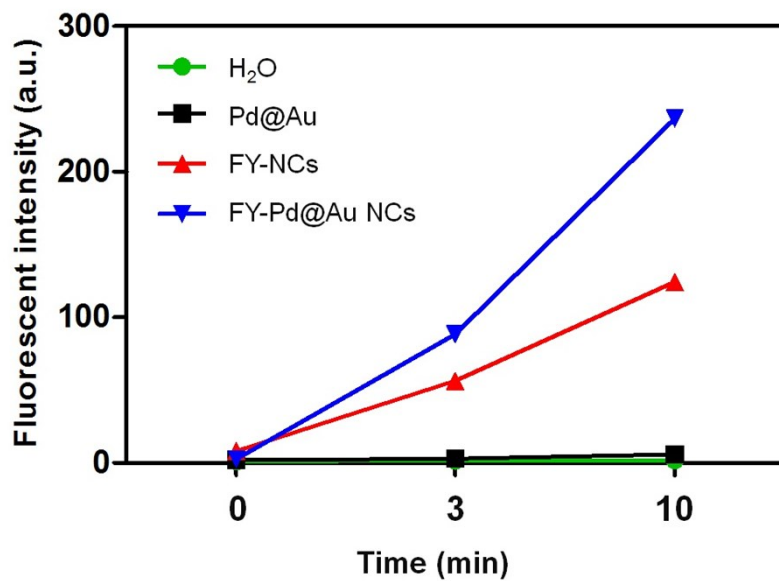

**Figure S4.** The DCFH-DA fluorescence for H<sub>2</sub>O, Pd@Au, FY-NCs and FY-Pd@Au NCs with 808 nm laser irradiation.

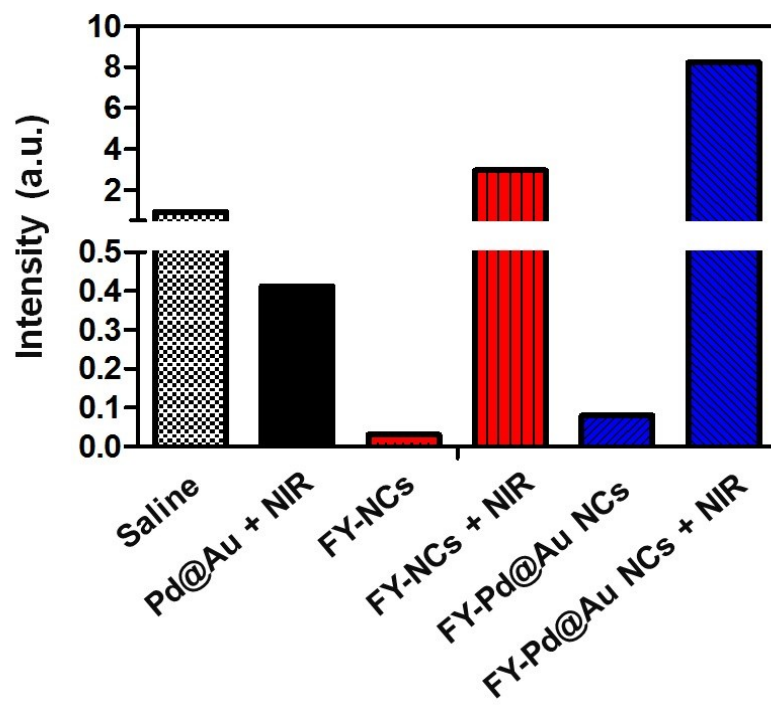

**Figure S5.** The mean DFCH-DA fluorescence for saline, Pd@Au, FY-NCs and FY-Pd@Au NCs with 808 nm laser irradiation.

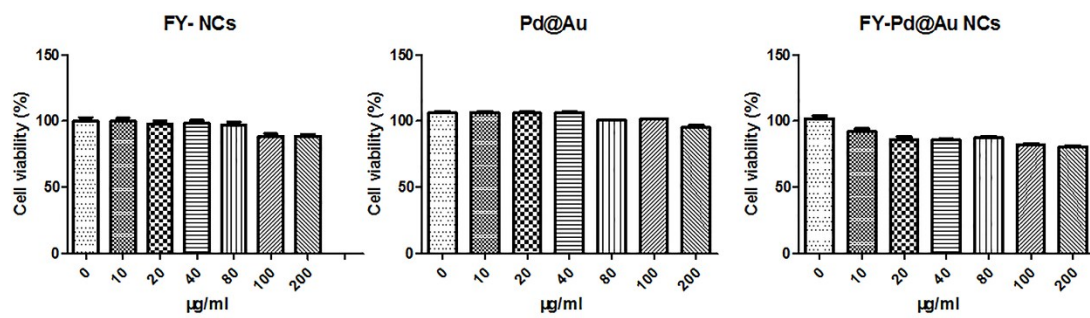

**Figure S6.** MTT of 4T1 cells treated with Pd@Au, FY-NCs and FY-Pd@Au NCs.



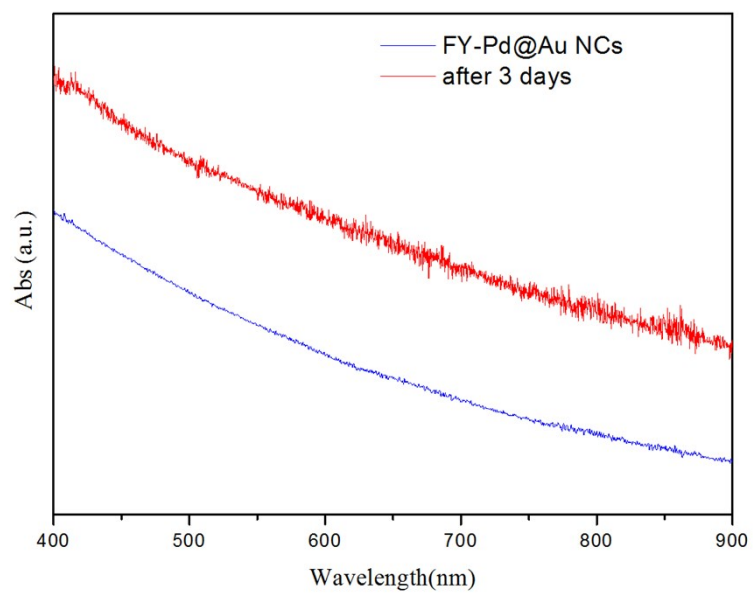

**Figure S7.** UV-vis absorption spectra of FY-Pd@Au NCs before and after 3 days treated.

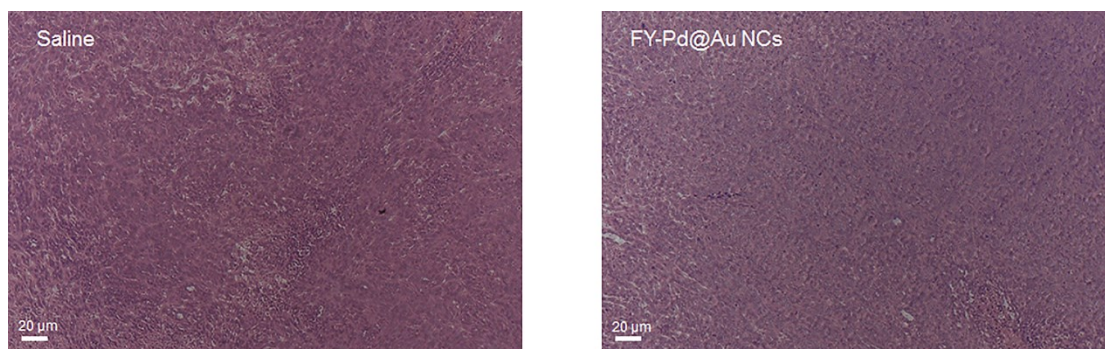

**Figure S8.** H&E-stained tumor slices after treatments.

**Table 1.** The  $^{19}\text{F}$  Relaxation Times of FY-Pd@Au NCs

|  | Longitudinal Relaxation<br>Time (T1) [ms] | Transverse Relaxation<br>Time (T2) [ms] |
|--|-------------------------------------------|-----------------------------------------|
|  |                                           |                                         |

|              |      |       |
|--------------|------|-------|
| FY-NCs       | 3628 | 56.66 |
| FY-Pd@Au NCs | 1497 | 37.22 |
